# Supplementary material for: Ozonolysis–oxidation-driven top-down strategy for the target preparation of ultrathin 2D metal–organic framework monolayers
Source: Royal Society of Chemistry journal article supplement (doi:10.1039/d3im00045a), 2023-07-12
Supplement: d3im00045a1.pdf [file d3im00045a1.pdf]

## Electronic Supplementary Information (ESI)

### Ozonolysis–oxidation-driven top-down strategy for target preparation of ultrathin 2D metal–organic framework monolayers

Baoliu Zhuo,<sup>†a</sup> Aidong Tan,<sup>†ab</sup> Zhipeng Xiang,<sup>\*a</sup> Jinhua Piao,<sup>c</sup> Wenhao Zheng,<sup>a</sup> Kai Wan,<sup>a</sup> Zhenxing Liang,<sup>\*a</sup> and Zhiyong Fu<sup>\*a</sup>

<sup>a</sup>Guangdong Provincial Key Laboratory of Fuel Cell Technology, School of Chemistry and Chemical Engineering, South China University of Technology, Guangzhou 510641, P.R. China

<sup>b</sup>Institute of Energy Power Innovation, North China Electric Power University, Beijing, 102206, P.R. China

<sup>c</sup>School of Food Science and Engineering, South China University of Technology, Guangzhou 510641, P.R. China

<sup>†</sup>These authors contributed equally to this work.

\*Corresponding authors: E-mail: xzp20209094@scut.edu.cn (Z.P. Xiang), zliang@scut.edu.cn (Z.X. Liang), zyfu@scut.edu.cn (Z.Y. Fu)

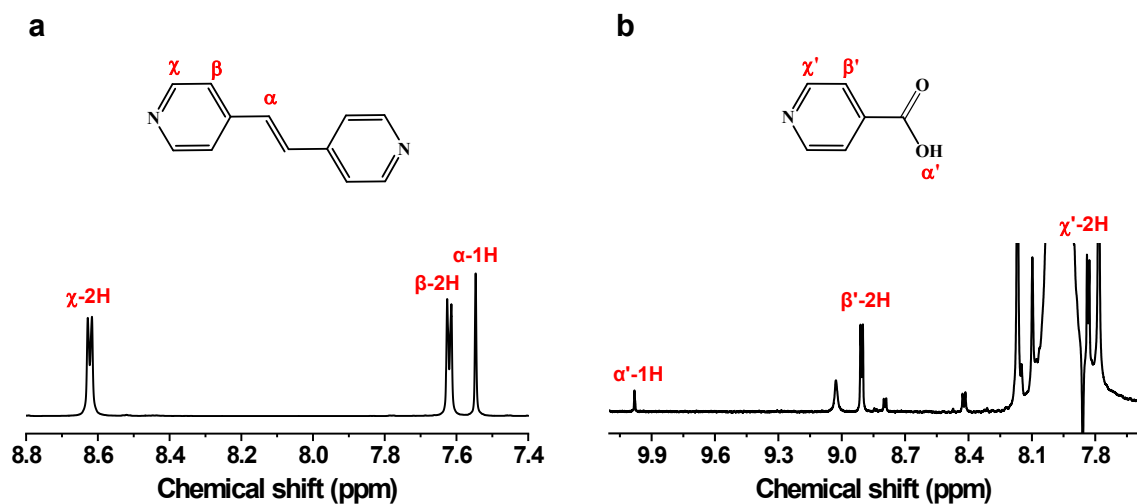

**Fig. S1** (a) The <sup>1</sup>H NMR spectra of the *trans*-1, 2-bis(4pyridyl)ethylene; (b) The <sup>1</sup>H NMR spectra of the *trans*-1, 2-bis(4pyridyl)ethylene after ozone treatment in DMF at 0 °C.

The <sup>1</sup>H nuclear magnetic resonance (NMR) spectroscopy is employed to characterize the structure of the *trans*-1, 2-bis(4pyridyl)ethylene before and after ozone treatment. It can be seen from Fig. S2b that the chemical shifts at  $\delta = 10.12$  ppm, 8.91 ppm, 8.90 ppm, 7.84 ppm and 7.83 ppm, which are consistent with the theoretical <sup>1</sup>H NMR spectra of the isonicotinic acid. These results confirm the breakage of the olefin group in the *trans*-1, 2-bis(4pyridyl)ethylene.

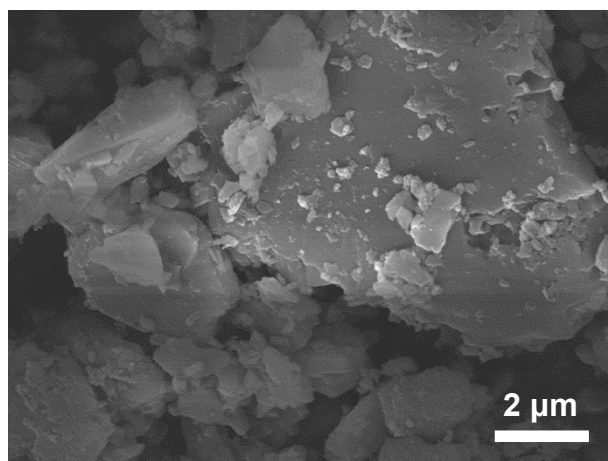

**Fig. S2** SEM image of the 3D pillar-layered Co-MOF precursor.

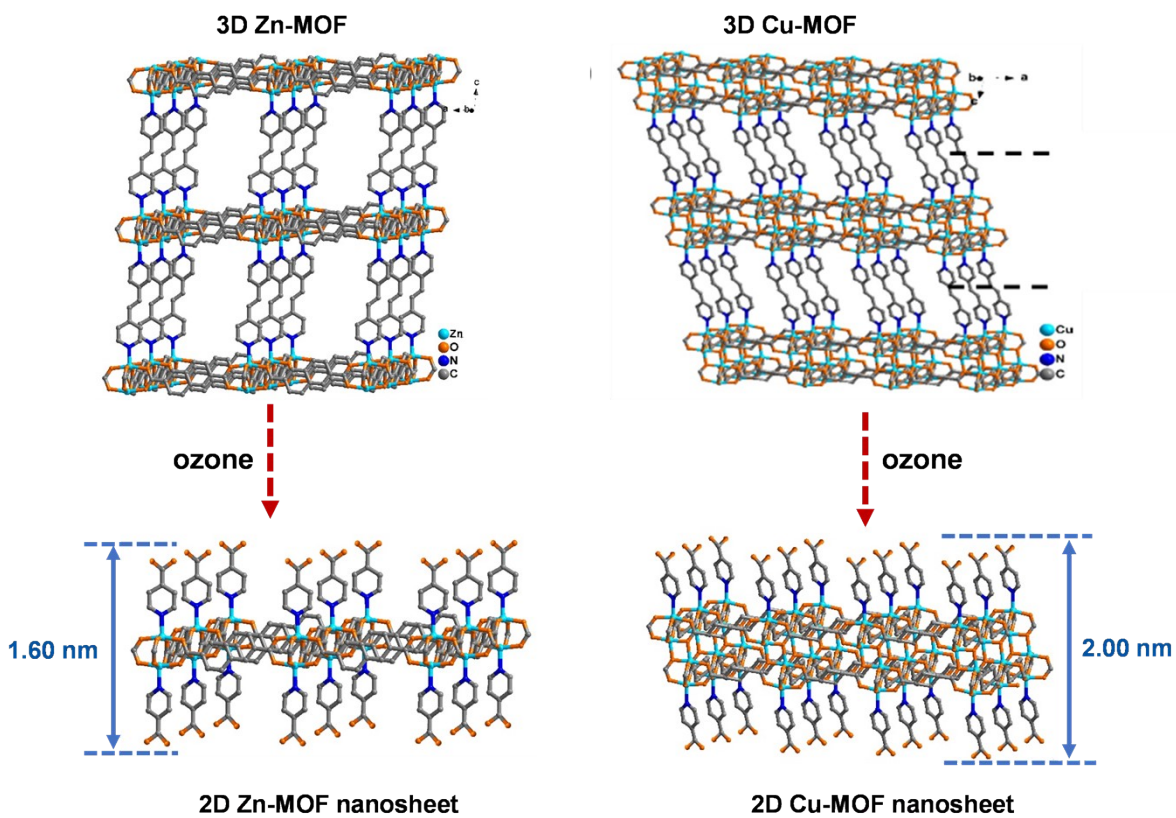

**Fig. S3** The 3D pillar-layered structure of the Zn-MOF and Cu-MOF and the corresponding structure of the 2D Zn-MOF nanosheet and 2D Zn-MOF nanosheet.

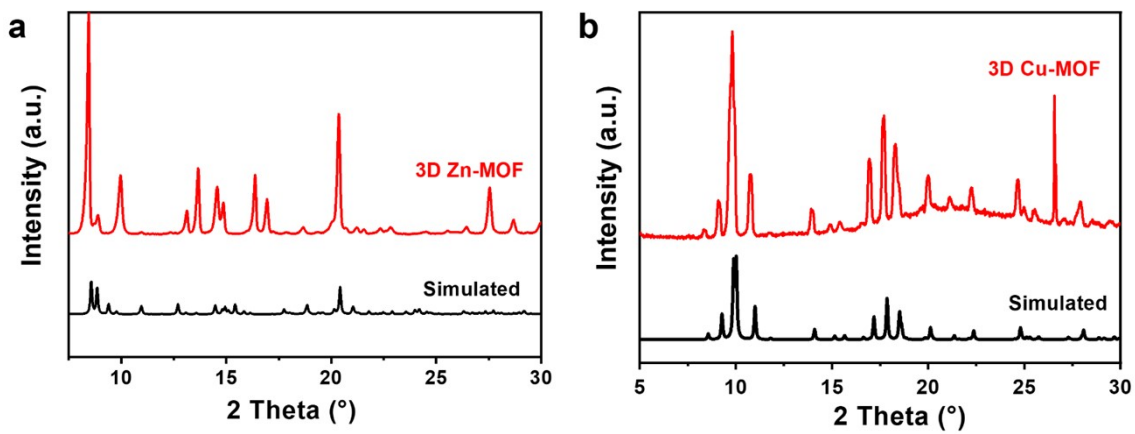

**Fig. S4** The simulated XRD patterns of the 3D Zn-MOF and 3D Cu-MOF

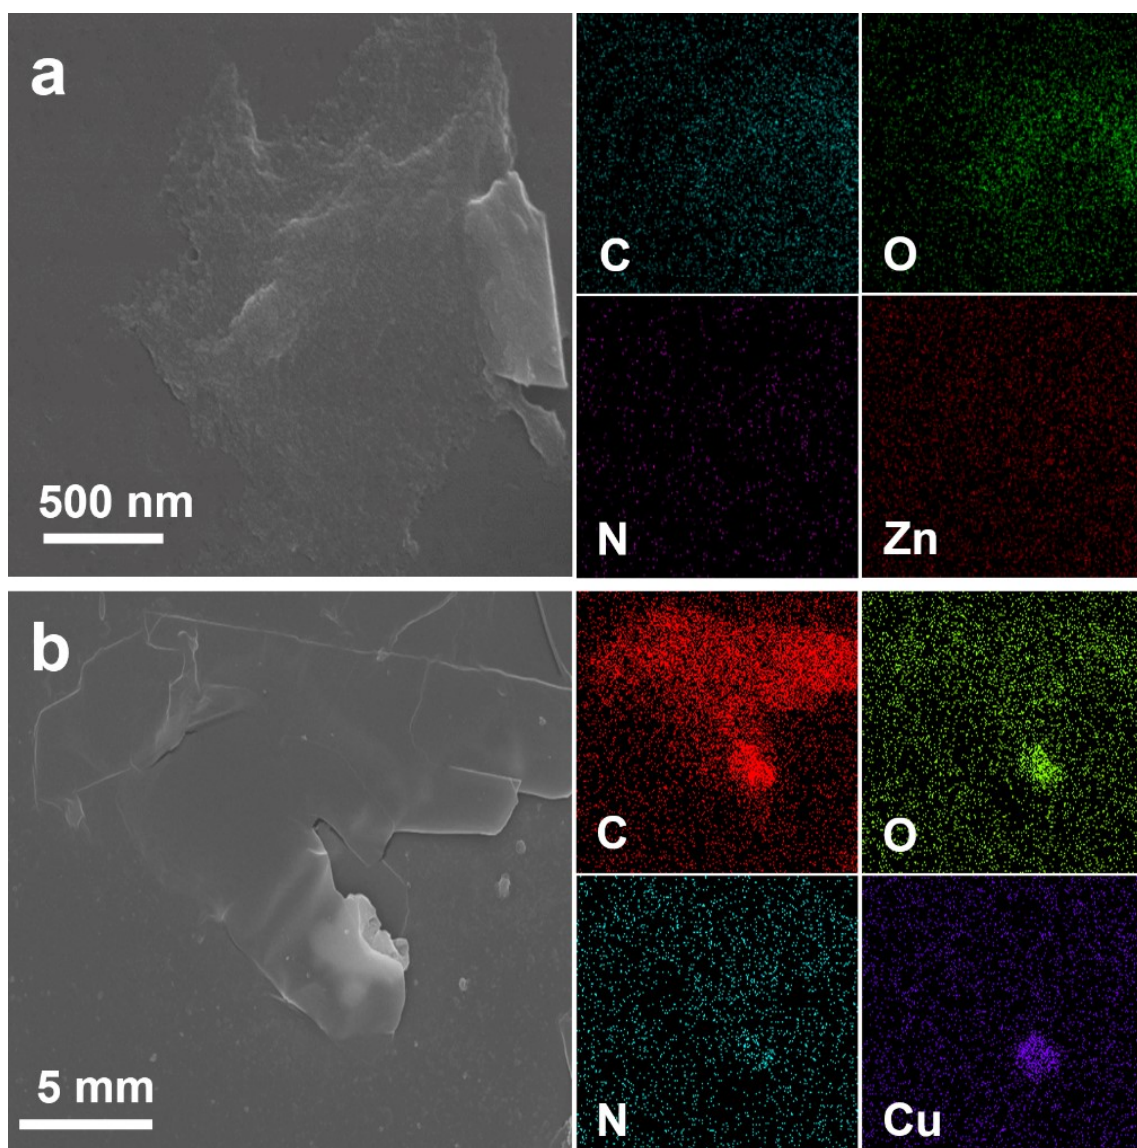

**Fig. S5** (a) SEM images of 2D Zn-MOF and corresponding elemental maps; b) SEM images of 2D Cu-MOF and corresponding elemental maps.

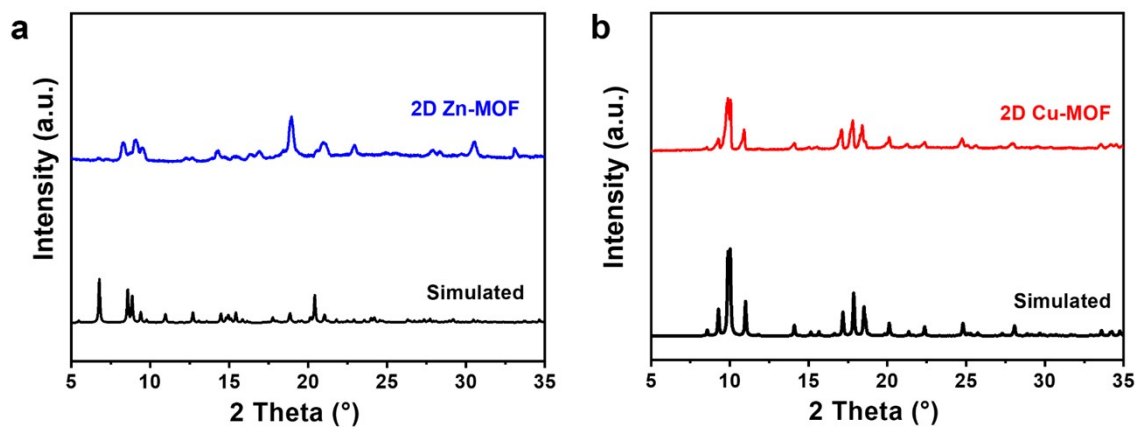

**Fig. S6** The simulated XRD patterns of the 2D Zn-MOF and 2D Cu-MOF.

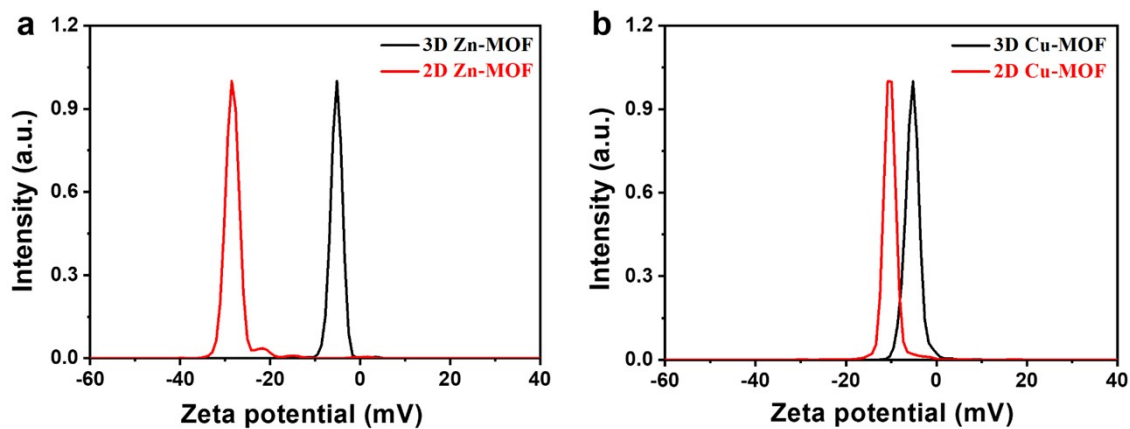

**Fig. S7** Zeta potential of the (a) 3D Zn-MOF precursor, 2D Zn-MOF nanosheets and the (b) 3D Cu-MOF precursor, 2DCu-MOF nanosheet.
